# Supplementary material for: The Welfare Aggregation and Guidance (WAG) Tool: A New Method to Summarize Global Welfare Assessment Data for Equids
Source: MDPI journal article supplement (doi:10.3390/ani10040546), 2020-03-25
Supplement: s1 [file s1]

**Table S1:** Questions and responses for the welfare categories of health, behaviour, nutrition, working conditions and housing conditions categories. The questions indicated with asterisks represent the main question in the decision tree (\*), and an alternative question (\*\*) for conditions where it is not possible to answer the main question.

| Category       | Question                                                       | ‘Green’ responses                                                                                                     | ‘Amber’ responses                                                     | ‘Red’ responses                                                                                                                                                                                                                                                                                                                                                      |
|----------------|----------------------------------------------------------------|-----------------------------------------------------------------------------------------------------------------------|-----------------------------------------------------------------------|----------------------------------------------------------------------------------------------------------------------------------------------------------------------------------------------------------------------------------------------------------------------------------------------------------------------------------------------------------------------|
| General health | Are there any signs of skin system alterations?                | no                                                                                                                    | yes, scars<br>yes, alopecia<br>yes, swellings                         | yes, open wounds<br><br>yes, sarcoids                                                                                                                                                                                                                                                                                                                                |
|                | Is the equid lame?                                             | no lameness                                                                                                           | yes (intermittently or consistently lame)                             | yes, non-weight bearing<br>yes (severely lame/unable to walk)<br>nasal and / or eye discharge<br>signs of diarrhoea<br>significant discharge from penis or vulva<br>abdominal pain                                                                                                                                                                                   |
|                | Please indicate obvious signs of illness                       | no signs present                                                                                                      |                                                                       |                                                                                                                                                                                                                                                                                                                                                                      |
|                | Is the equids coat healthy?                                    | Yes                                                                                                                   |                                                                       | No                                                                                                                                                                                                                                                                                                                                                                   |
| Behaviour      | General attitude of the equid at a distance?                   | at ease - relaxed, calm and/or resting<br>alert and actively interested in surroundings                               |                                                                       | apathetic, depressed, withdrawn<br>agitated, aggressive, hyper-reactive/vigilant                                                                                                                                                                                                                                                                                     |
|                | Please indicate signs of fear and distress present             | no signs of fear and distress present                                                                                 |                                                                       | showing the whites of the eyes<br>unpredictable or sudden movements<br>sudden startle responses when standing quietly<br>aggressive behaviour<br>trembling or head shyness<br>completely withdrawn/shut down<br>signs of hot brand, firing<br>signs of limb tethering or hobbling<br>signs of amputations or mutilations<br>signs of use of live serretta or similar |
|                | Presence of signs of harmful practices?                        | no                                                                                                                    |                                                                       |                                                                                                                                                                                                                                                                                                                                                                      |
|                | * Owner's/user's/handler's interaction when holding the equid? | relaxed and confident                                                                                                 | assertive / indifferent<br>cautious/fearful                           | aggressive                                                                                                                                                                                                                                                                                                                                                           |
|                | ** Is the equid with other animal(s)?                          | yes, physical contact                                                                                                 | yes, visual contact                                                   | No                                                                                                                                                                                                                                                                                                                                                                   |
|                | Body condition?                                                | ideal                                                                                                                 | thin/moderate<br>fat                                                  | very thin/poor<br>very fat/obese                                                                                                                                                                                                                                                                                                                                     |
| Nutrition      | For how long is fibre available?                               | 18-24                                                                                                                 | 14-18                                                                 | Below 14                                                                                                                                                                                                                                                                                                                                                             |
|                | Is the equid getting an appropriate diet?                      | Chopped fibre, chaff, other prepared fibre<br>Grass or browse<br>Hay or haylage or straw/stover<br>vitamins / mineral | legumes/pulses<br><br>creep feed                                      | Silage<br>cereal grains<br>Sugar based products                                                                                                                                                                                                                                                                                                                      |
|                | * Access to clean water during working period                  | free access to clean water                                                                                            | free access to partially dirty water<br>limited access to clean water | Free access to dirty water<br>limited access to partially dirty water<br>No access                                                                                                                                                                                                                                                                                   |
|                | ** Presence of a clean water point?                            | Yes, clean                                                                                                            | Yes but partially dirty                                               | Yes but dirty, or none                                                                                                                                                                                                                                                                                                                                               |
|                |                                                                |                                                                                                                       |                                                                       |                                                                                                                                                                                                                                                                                                                                                                      |

| Category           | Question                                                   | ‘Green’ responses                                                                                                          | ‘Amber’ responses                                | ‘Red’ responses                        |
|--------------------|------------------------------------------------------------|----------------------------------------------------------------------------------------------------------------------------|--------------------------------------------------|----------------------------------------|
| Working conditions | Number of hours working per day (on average)?              | Up to 6 hours                                                                                                              | More than 6, less than or equal to 9 hours       | more than 9 hours                      |
|                    | Number of working days per week (on average)?              | 5 days or less                                                                                                             | 6 days                                           | 7 days                                 |
|                    | At what age did the equid start to work?                   | Aged between 4 and 20 years old<br>greater than 5 years old (adult)                                                        | Between 1 and 3 years old<br>Older than 20 years | One year old or younger                |
|                    | Does the equid get a rest break during the day?            | yes, saddle/harness and load/vehicle removed                                                                               | yes, saddle/harness and load/vehicle not removed | no rest                                |
| Housing conditions | Please indicate the housing regime of the equid            | stabled equid with access to an exercise area<br>stabled equid with access to field<br>kept outside with access to shelter | indoor housing (stabled equid)                   | kept outside without access to shelter |
|                    | Is there a clean, dry lying area/comfortable resting area? | yes                                                                                                                        |                                                  | No                                     |
|                    | Is the environment clean?                                  | yes                                                                                                                        |                                                  | No                                     |
|                    | Is the environment free from hazards?                      | yes                                                                                                                        |                                                  | No                                     |

**Table S2:** Foal-specific questions and responses for the welfare categories of nutrition and behaviour. The questions indicated with asterisks represent the main question in the decision tree (\*), and an alternative question (\*\*) for conditions where it is not possible to answer the main question.

| Category  | Question                                                       | ‘Green’ responses                                                                       | ‘Amber’ responses                                                     | ‘Red’ responses                                                                                                                                                                                              |
|-----------|----------------------------------------------------------------|-----------------------------------------------------------------------------------------|-----------------------------------------------------------------------|--------------------------------------------------------------------------------------------------------------------------------------------------------------------------------------------------------------|
| Nutrition | Body condition?                                                | ideal                                                                                   | thin/moderate<br>fat                                                  | very thin/poor<br>very fat/obese                                                                                                                                                                             |
|           | Describe the foals access to milk                              | Free access to equid milk;                                                              | Free access to milk replacer (formulated for equids);                 | Limited access to equid milk; free access to any other non-equine specific milk                                                                                                                              |
|           | How many hours per day does the foal spend with its mother?    | Greater than 18 hours                                                                   | 12 to 18 hours                                                        | Less than 12 hours                                                                                                                                                                                           |
|           | * Access to clean water during working period                  | free access to clean water                                                              | free access to partially dirty water<br>limited access to clean water | Free access to dirty water<br>limited access to partially dirty water<br>No access                                                                                                                           |
|           | ** Presence of a clean water point?                            | Yes, clean                                                                              | Yes but partially dirty                                               | Yes but dirty, or none                                                                                                                                                                                       |
| Behaviour | General attitude of the equid at a distance?                   | at ease - relaxed, calm and/or resting<br>alert and actively interested in surroundings |                                                                       | apathetic, depressed, withdrawn<br>agitated, aggressive, hyper-reactive/vigilant                                                                                                                             |
|           | Please indicate signs of fear and distress present             | no signs of fear and distress present                                                   |                                                                       | showing the whites of the eyes<br>unpredictable or sudden movements<br>sudden startle responses when standing quietly<br>aggressive behaviour<br>trembling or head shyness<br>completely withdrawn/shut down |
|           | Is the foal showing signs of pain related behaviour?           | no                                                                                      |                                                                       | yes                                                                                                                                                                                                          |
|           | * Owner's/user's/handler's interaction when holding the equid? | relaxed and confident                                                                   | assertive / indifferent<br>cautious/fearful                           | aggressive                                                                                                                                                                                                   |
|           | ** Presence of signs of harmful practices?                     | no                                                                                      |                                                                       | signs of hot brand, firing<br>signs of limb tethering or hobbling<br>signs of amputations or mutilations<br>signs of use of live serreta or similar                                                          |

**Table S3:** Role of the equids assessed in each region and country. For working animals, the percentage of equids found in each place or type of work is provided. The percentage (Percent of equids) and number (n) of equids in each specified role per country, and in total, is provided

|        | Countries      | Equids role                         | Type of work (if applicable)         | %         | (n)           |
|--------|----------------|-------------------------------------|--------------------------------------|-----------|---------------|
| Asia   | China          | Production animal                   | --                                   | 100       | (61)          |
|        | India          | Draft or pack animal                | Brick kiln transport                 | 85        | (88)          |
|        |                |                                     | Construction site (pack)             | 15        | (15)          |
|        | Nepal          | Draft or pack animal                | Brick kiln transport                 | 95        | (2434)        |
|        |                |                                     | Mountain transport (pack)            | 5         | (123)         |
|        | Pakistan       | Draft or pack animal                | Brick kiln transport (pack)          | 24        | (153)         |
|        |                |                                     | Coal mine transport (pack)           | 3         | (20)          |
|        |                |                                     | Farm work                            | 4         | (23)          |
|        |                |                                     | Transport of goods to market (draft) | 55        | (347)         |
|        |                |                                     | Other work (pack or draft)           | 14        | (92)          |
| Total  |                | <i>Production animal</i>            |                                      | 2         | (61)          |
|        |                | <i>Draft or pack animal</i>         |                                      | 98        | (3295)        |
|        |                | <i>Companion / sanctuary animal</i> |                                      | 0         | (0)           |
| Europe | Cyprus         | Companion / sanctuary animal        | --                                   | 100       | (52)          |
|        | Greece         | Draft or pack animal                | Construction site (pack)             | 2         | (5)           |
|        |                |                                     | Tourism (riding)                     | 90        | (18)          |
|        |                | Companion / sanctuary animal        | --                                   | 8         | (208)         |
|        | Ireland        | Companion / sanctuary animal        | --                                   | 100       | (70)          |
|        | Italy          | Production animal                   | --                                   | 81        | (97)          |
|        |                | Companion / sanctuary animal        | --                                   | 19        | (23)          |
|        | Romania        | Companion / sanctuary animal        | --                                   | 94        | (34)          |
|        |                | Draft or pack animal                | Transport of goods to market         | 6         | (2)           |
|        | Spain          | Other work                          | Religious festival                   | 100       | (38)          |
|        | United Kingdom | Companion / sanctuary animal        | --                                   | 100       | (2658)        |
| Total  |                | <i>Production animal</i>            |                                      | 3         | (97)          |
|        |                | <i>Draft or pack animal</i>         |                                      | 7         | (215)         |
|        |                | <i>Companion / sanctuary animal</i> |                                      | 89        | (2855)        |
| Total  |                | <b>Production animal</b>            |                                      | <b>2</b>  | <b>(158)</b>  |
|        |                | <b>Draft or pack animal</b>         |                                      | <b>53</b> | <b>(3510)</b> |
|        |                | <b>Companion / sanctuary animal</b> |                                      | <b>44</b> | <b>(2855)</b> |

**Table S4:** Percentage (%) and number (n) of each species of equids included in the WAG protocol assessment per country. Hybrids refers to hinnies and mules.

|              |              | Donkey    |               | Hybrid    |               | Horse     |               |
|--------------|--------------|-----------|---------------|-----------|---------------|-----------|---------------|
| Countries    |              | %         | (n)           | %         | (n)           | %         | (n)           |
| Asia         | China        | 97        | (59)          | 3         | (2)           | --        |               |
|              | India        | 71        | (73)          | 25        | (26)          | 4         | (4)           |
|              | Nepal        | 3         | (83)          | 58        | (1481)        | 39        | (993)         |
|              | Pakistan     | 73        | (466)         | 12        | (75)          | 15        | (94)          |
|              | <i>Total</i> | 20        | (681)         | 47        | (1584)        | 33        | (1091)        |
| Europe       | Cyprus       | 100       | (52)          | --        |               | --        |               |
|              | Greece       | 23        | (53)          | 75        | (173)         | 2         | (5)           |
|              | Ireland      | 90        | (63)          | 10        | (7)           | --        |               |
|              | Italy        | 100       | (120)         | --        |               | --        |               |
|              | Romania      | 100       | (36)          | --        |               | --        |               |
|              | Spain        | 3         | (1)           | 97        | (37)          | --        |               |
|              | UK           | 91        | (2427)        | 8         | (203)         |           |               |
|              | <i>Total</i> | 86        | (2752)        | 13        | (420)         | < 1       | (33)          |
| <b>Total</b> |              | <b>53</b> | <b>(3433)</b> | <b>31</b> | <b>(2004)</b> | <b>17</b> | <b>(1124)</b> |

**Table S5:** Percentage (%) and number (n) of each sex of equids included in the WAG protocol assessment per country. For a small number of animals, it was not possible to identify the sex for health and safety reasons.

|           |                | Female |        | Male |        | <i>Not assessed or<br/>not available</i> |      |
|-----------|----------------|--------|--------|------|--------|------------------------------------------|------|
| Countries |                | %      | (n)    | %    | (n)    | %                                        | (n)  |
| Asia      | China          | 80     | (49)   | 20   | (12)   | --                                       |      |
|           | India          | 18     | (19)   | 80   | (82)   | 2                                        | (2)  |
|           | Nepal          | 28     | (722)  | 72   | (1834) | < 1                                      | (1)  |
|           | Pakistan       | 18     | (113)  | 82   | (522)  | --                                       |      |
|           | <i>Total</i>   | 27     | (903)  | 73   | (2450) | < 1                                      | (3)  |
| Europe    | Cyprus         | 31     | (16)   | 69   | (36)   | --                                       |      |
|           | Greece         | 68     | (156)  | 31   | (71)   | 2                                        | (4)  |
|           | Ireland        | 33     | (23)   | 67   | (47)   | --                                       |      |
|           | Italy          | 73     | (87)   | 24   | (29)   | 3                                        | (4)  |
|           | Romania        | 39     | (14)   | 61   | (22)   | --                                       |      |
|           | Spain          | 37     | (14)   | 63   | (24)   | --                                       |      |
|           | United Kingdom | 33     | (865)  | 67   | (1792) | < 1                                      | (1)  |
|           | <i>Total</i>   | 37     | (1175) | 63   | (2021) | < 1                                      | (9)  |
| Total     |                | 32     | (2078) | 68   | (4471) | < 1                                      | (12) |
